# Supplementary material for: Development of Zika Virus Mini-Replicon Based Single-Round Infectious Particles as Gene Delivery Vehicles
Source: MDPI journal article supplement (doi:10.3390/v15081762), 2023-08-18
Supplement: s1 [file s1]

## Supplemental materials

**Supplemental Table 1.** Primers for cloning ZIKV mini-replicons

| Primer name                                                            | Primer sequences                                                                                         |
|------------------------------------------------------------------------|----------------------------------------------------------------------------------------------------------|
| <b>ZIKV 5'UTR-C-eGFP-Δ-RdRp-3'UTR (ZV mini-rep 1-GFP)</b>              |                                                                                                          |
| NotI_Rsr_ZV nt7830-For                                                 | 5'-CGCGGCCGCACGGACCGGTGTCCCGAGGAAGTGCAAAGCTGAGATG-3'                                                     |
| ZV C_KpnI_AscI-Rev                                                     | 5'-GTTGGCGCGCCGGTACCTGCACTCCCACGTCTAGTGAC-3'                                                             |
| AscI_T2A_GFP-For                                                       | 5'-CCGGCGCGCCAACCGGTACGCGTGAGGGCAGGGGAAGTCTTCTAACATGCGGGGACGTGGAGGAAAATCCCGGGCCCATGGTGAGCAAGGCGAGGAGC-3' |
| F2A_NotI-Rev                                                           | 5'-CCCTGCGGCCGCGGGCCCCGGGGTTGGA-3'                                                                       |
| <b>ZIKV 5'UTR-C-eGFP-Δ-NS5-3'UTR (ZV mini-rep 2-GFP)</b>               |                                                                                                          |
| ZIKV NS5 MTase_NotI-For                                                | 5'-ACCGCGGCCGCAGGGGGTGGAACAGGAGAGACCTG-3'                                                                |
| ZIKV NS5(8406)_AvrII-Rev                                               | 5'-TATTTCACTGGCCTCCTAGGCCCGT-3'                                                                          |
| <b>ZIKV 5'UTR-C-eGFP-Δ-NS4A'-NS4B-NS5-3'UTR (ZV mini-rep 3-GFP)</b>    |                                                                                                          |
| NS4A'_NotI For                                                         | 5'-ATAGCGGCCGCATTGGGCAAGGGCATAGGG-3'                                                                     |
| <b>ZIKV 5'UTR-C-Δ-RdRp-3'UTR (ZV mini-rep 1-no reporter)</b>           |                                                                                                          |
| ClaI_EcoRV_3'GFP-For                                                   | 5'-GTATCGATGATATCACTCTCGGCATGGACGAG-3'                                                                   |
| 5'GFP_MluI_ClaI-Rev                                                    | 5'-TCATCGATACGCGTGAACAGCTCCTCGCCCTT-3'                                                                   |
| <b>ZIKV 5'UTR-C-CFP/YFP-Δ-RdRp-3'UTR (ZV mini-rep 1-CYP)</b>           |                                                                                                          |
| KpnI_CFP-For                                                           | 5'-ATAGGTACCATGGTTAGCAAGGGCGAG-3'                                                                        |
| YFP_AscI-Rev                                                           | 5'-TATGGCGCGCCGTTTGTACAGTTCGTCCAT-3'                                                                     |
| <b>ZIKV 5'UTR-C-CFP/YFP-Δ-NS5-3'UTR (ZV mini-rep 2-CYP)</b>            |                                                                                                          |
| ZIKV NS5 MTase_NotI-For                                                | 5'-ACCGCGGCCGCAGGGGGTGGAACAGGAGAGACCTG-3'                                                                |
| ZIKV NS5(8406)_AvrII-Rev                                               | 5'-TATTTCACTGGCCTCCTAGGCCCGT-3'                                                                          |
| <b>ZIKV 5'UTR-C-CFP/YFP-Δ-NS4A'-NS4B-NS5-3'UTR (ZV mini-rep 3-CYP)</b> |                                                                                                          |
| NS4A'_NotI For                                                         | 5'-ATAGCGGCCGCATTGGGCAAGGGCATAGGG-3'                                                                     |
| <b>ZIKV 5'UTR-C-hACE2-eGFP-Δ-NS5-3'UTR (ZV mini-rep 2-hACE2)</b>       |                                                                                                          |
| KpnI-ACE2-For                                                          | 5'-ATAGGTACCATGTCAAGCTCTTCCTGG-3'                                                                        |
| ACE2_AscI-Rev                                                          | 5'-ATAGGCGCGCCTTTACCCGGAGACAGGGAAG-3'                                                                    |

**Supplemental Table 2.** Primers for real-time RT PCR assays

| Primer name       | Primer sequences              |
|-------------------|-------------------------------|
| <b>ZIKV NS5</b>   |                               |
| ZV-NS5-For        | 5'-CTTGTGGCTGCTGCGGAGGTCA-3'  |
| ZV-NS5-Rev        | 5'-GTGGTGGGAGCAAACGGAAC TT-3' |
| <b>Human ACE2</b> |                               |
| hACE2-For         | 5'-AGCCCCCATCGAGAAAACCATC-3'  |
| Hace2-Rev         | 5'-TGCCCAT TGCTCTCCCACTCC-3'  |

## A. ZV mini-rep 1-GFP

ATCAAGCATGGGATATAAAGAGTTCAGAAGATCTGGCTGCCATGCTGAGAATAATCAATGCTAGGAAGGAGAAGAAGA  
GACGAGGCGCAGATACTAGTGTCCGAATTGTTGGCCTCCTGCTGACCACAGCTATGGCAGCGGAGGTCACTAGACGTG  
GGAGTGCAGGTACC<sup>KpnI</sup>GGCGCGCC<sup>AscI</sup>ACCGGT<sup>Agal</sup>ACGCGT<sup>MuI</sup>GAGGGCAGGGGAAGTCTTCTAACATGCGGGGACGTGGAGGAA<sup>T2A</sup>  
AATCCCGGGCCC<sup>T2A</sup>ATGGTGAGCAAGGGCGAGGAGCTGTTACCGGGGTGGTGCCATCCTGGTCGAGCTGGACGGCGA  
CGTAAACGGCCACAAGTTCAGCGTGTCCGGCGAGGGCGAGGGCGATGCCACCTACGGCAAGCTGACCCCTGAAGTTCA  
TCTGCACCACCGGCAAGCTGCCCCTGCCCTGGCCACCCCTCGTGACCACCCCTGACCTACGGCGTGCAAGTTCAGCC  
GCTACCCCGACCATGAAGCAGCAGCACTTCTTCAAGTCCGCCATGCCCGAAGGCTACGTCCAGGAGCGCACCATCT  
TCTTCAAGGACGACGGCAACTACAAGACCCGCGCCGAGGTGAAGTTCGAGGGCGACACCCTGGTGAACCGCATCGAG  
CTGAAGGGCATCGACTTCAAGGAGGACGGCAACATCTGGGGCACAAGCTGGGGTACAACCTACAACAGCCACAACGT  
CTATATCATGGCCGACAAGCAGAAGAACGGCATCAAGGTGAACCTTCAAGATCCGCCACAACATCGAGGACGGCAGCGT  
GCAGCTCGCCGACCACTACCAGCAGAACACCCCATCGGGCAGCGCCCGTGCTGCTGCCCGACAACCACTACCTGA  
GCACCCAGTCCGCCCTGTGCATAGACCCCAATGAGAAGCGCGATCACATGGTCTGCTGGAGTTCGTGACCGCCGCCG  
GGATCACTCTCGGCATGGACGAGCTGTACAAGAACTTTTGATTGCTCAAGTTGGCAGGAGACGTTGAGTCCAACCCCG<sup>F2A</sup>  
GGCCC<sup>F2A</sup>GGCGCGCC<sup>NotI</sup>ATCCCGAGGAAGTGCAAAGCTGAGATGGTTGGTGGGAGCGGGGATACCTGCAGCCCTATGGGA  
AAGGGTCA

## B. ZV mini-rep 1-no reporter

CATGGGTATATCAAGATGTTCAAGAAGATCTGGCTGCCATGCTGAGAATAATCAATGCTAGGAAGGAGAAGAA  
GAGACGAGGCGCAGATACTAGTGTCCGAATTGTTGGCCTCCTGCTGACCACAGCTATGGCAGCGGAGGTAC  
TAGACGTGGGAGTGCAGGTACC<sup>KpnI</sup>GGCGCGCC<sup>AscI</sup>ACCGGT<sup>Agal</sup>ACGCGT<sup>T2A</sup>GAGGGCAGGGGAAGTCTTCTAACATGCG  
GGGACGTGGAGGAAAATCCCGGGCCC<sup>T2A</sup>ATGGTGAGCAAGGGCGAGGAGCTGTTACCGGT<sup>MuI</sup>ATCGAT<sup>ClaI</sup>GATATCA<sup>EcoRV</sup>  
CTCTCGGCATGGACGAGCTGTACAAGAACTTTGATTGCTCAAGTTGGCAGGAGACGTTGAGTCCAACCCCG<sup>F2A</sup>  
GGCCC<sup>F2A</sup>GGCGCGCC<sup>NotI</sup>ATCCCGAGGAAGTGCAAAGCTGAGATGGTTGGTGGGAGCGGGGATACCTGCAGCCCTATG  
GAAAGGTCAATTGATCTTGGATGTGGCAGAGGGGGCTGGAGTTACTACGCCGCCACCATCCGCAAAGTTCAAG  
AAGTGAAAAGGATACAAAAAGGAGGCCCTGGTCATGAAGAACCCGTGTTGGTGCAAAGCTATGGGTGGAAC  
ATAGTCCGTCTTAAGAGTGGGGTGGACGTCTTTCATATGGCGGCTGAGCCGTGTGACACGTTGCTGTGTGACA  
TAGGTGAGTCATCATCTAGTCTGAAGTGGAAGAAGCACGGACGCTCAGAGTCTCTCCATGGTGGGGGATT  
GGCTTGAAAAAAGACCAGGAGCCTTTTGTATAAAAGTGTGTGCCATACACCAGCACTATGATGGAAACCCT  
GGAGCGACTGCAGCGTAGTATGGGGGAGGACTGGTCAGAG

**Supplemental Figure 1. The nucleotide sequence analysis of two constructs: ZV mini-rep 1-GFP (A) and ZV mini-rep 1-no reporter (B). The figure highlights the presence of restriction enzyme sites and includes the sequences of T2A and F2A peptides, which have been marked for reference.**

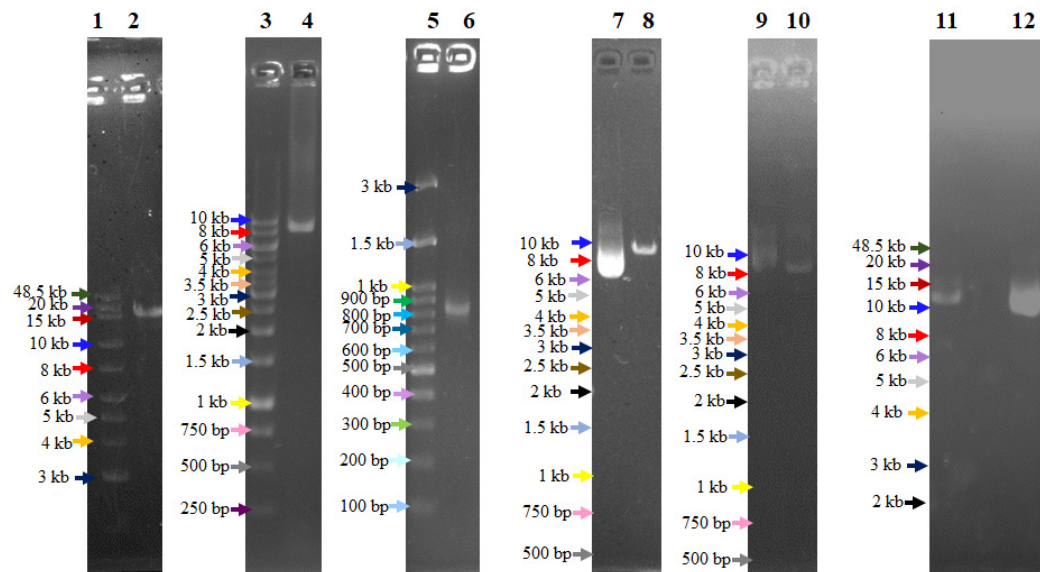

**Supplemental Figure 2. Gel electrophoresis analysis of ZIKV mini-replicons containing the GFP reporter.** The sizes of the ZIKV Natal RGN replicon, mini-replicons, and cDNA fragments F1 to F4 were analyzed using agarose gel electrophoresis. The gel lanes are labeled as follows: 1, DNA marker (1 kb Extend DNA ladder); 2, ZIKV replicon (15058 bp); 3, DNA marker (1 kb DNA ladder); 4, Fragment 1 (8326 bp); 5, DNA marker (100 bp DNA ladder); 6, Fragment 2 (853 bp); 7, ZIKV mini-rep 1-GFP (8726 bp); 8, ZIKV mini-rep 1-GFP cut by NotI; 9, ZIKV mini-rep 2-GFP (8890 bp); 10, ZIKV mini-rep 2-GFP cut by NotI; 11, ZIKV mini-rep 3-GFP (9868 bp); 12, ZIKV mini-rep 3-GFP cut by NotI.

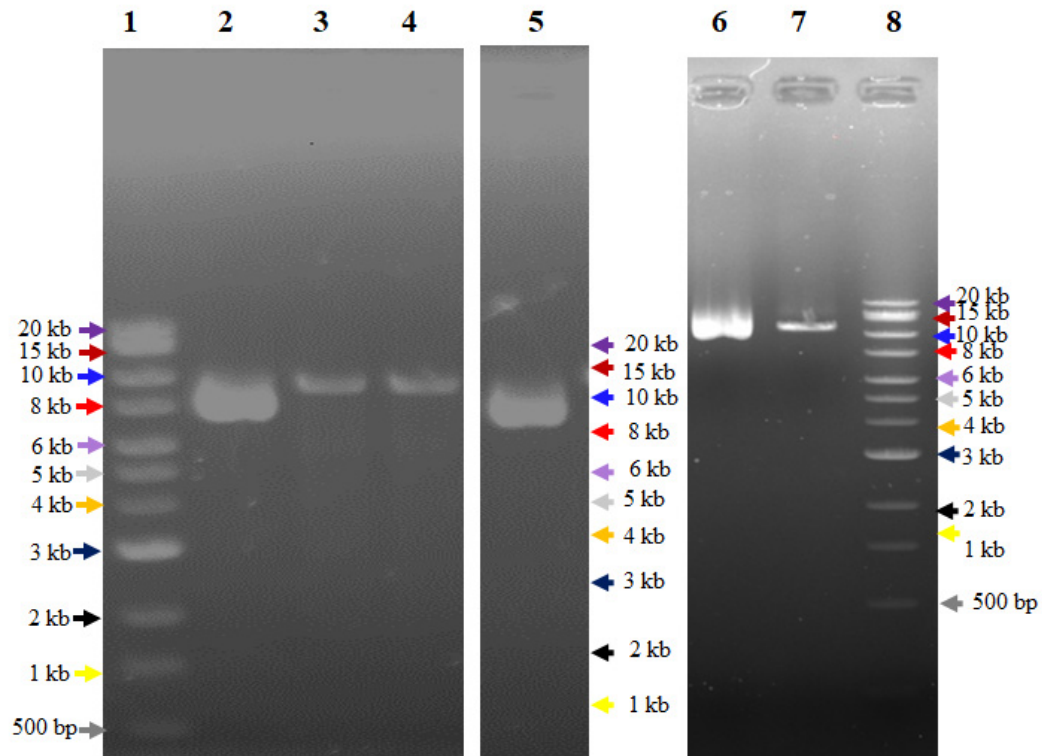

**Supplemental Figure 3. Gel electrophoresis analysis of ZIKV mini-replicons containing the CYP reporter (cyan fluorescent protein-linker-yellow fluorescent protein).** The sizes of the mini-replicons and cDNA fragment F5 were determined through agarose gel electrophoresis. The gel lanes are labeled as follows: 1, DNA marker (1 kb Extend DNA ladder); 2, Fragment 5; 3, ZIKV mini-rep 2-CYP (9730 bp); 4, ZIKV mini-rep 2-CYP cut by NotI; 5, Fragment 5; 6, ZIKV mini-rep 3-CYP (10708 bp); 7, ZIKV mini-rep 3-CYP cut by NotI; 8, DNA marker (1 kb Extend DNA ladder).
